# Supplementary material for: Analysis of O-glycoforms of the IgA1 hinge region by sequential deglycosylation
Source: PubMed Central journal article supplement (PMC6971281; doi:10.1038/s41598-020-57510-z), 2020-01-20
Supplement: 41598_2020_57510_MOESM1_ESM.pdf [file 41598_2020_57510_MOESM1_ESM.pdf]

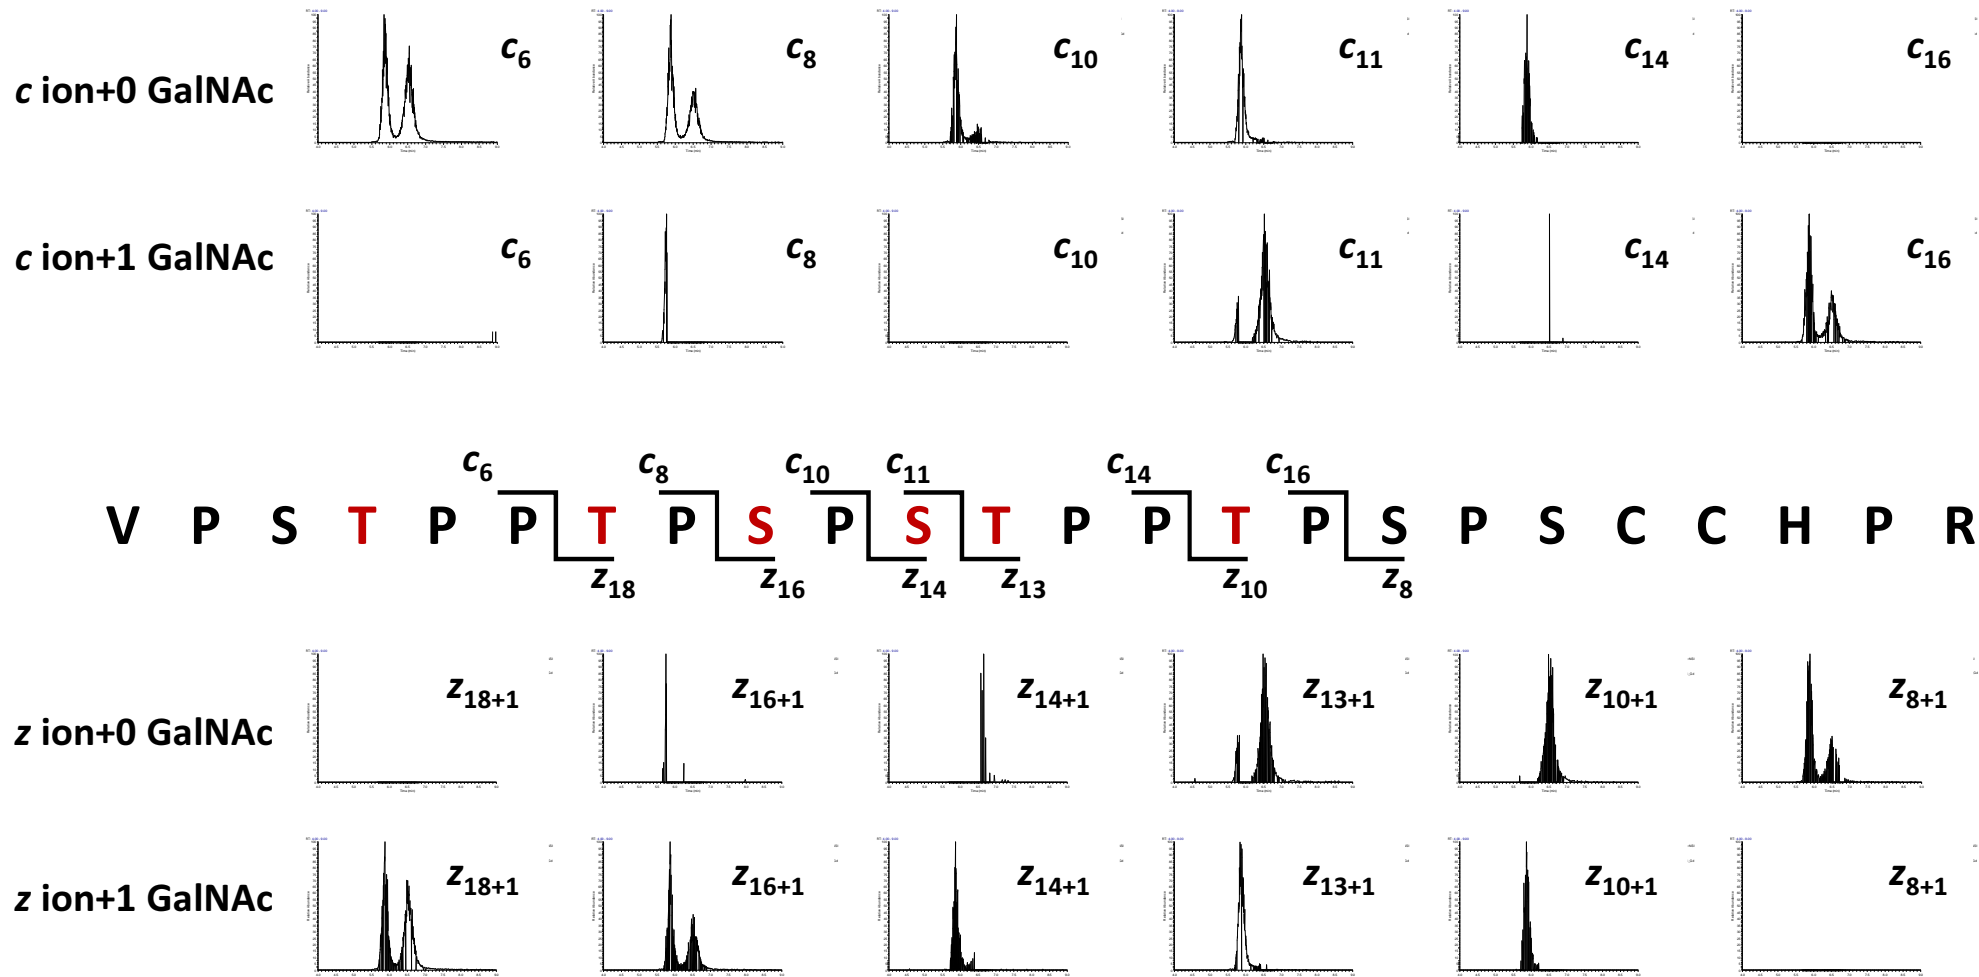

Supplementary Figure S1

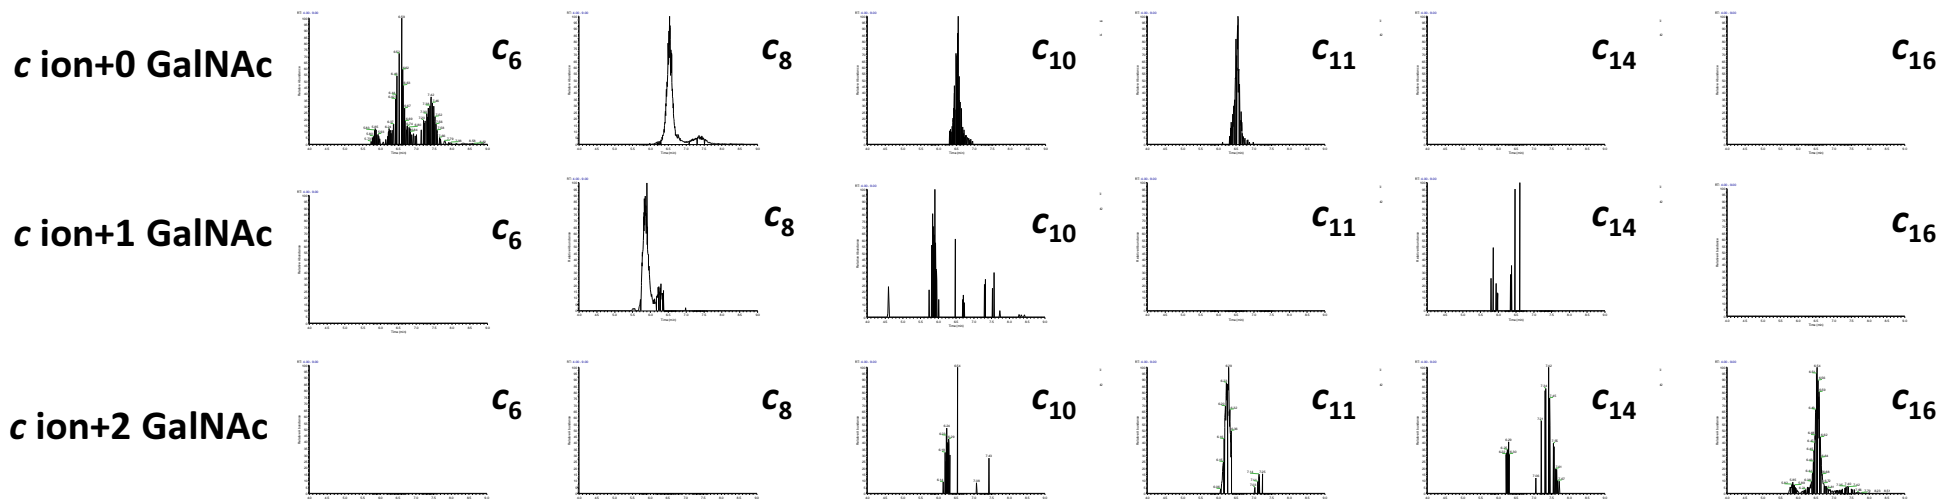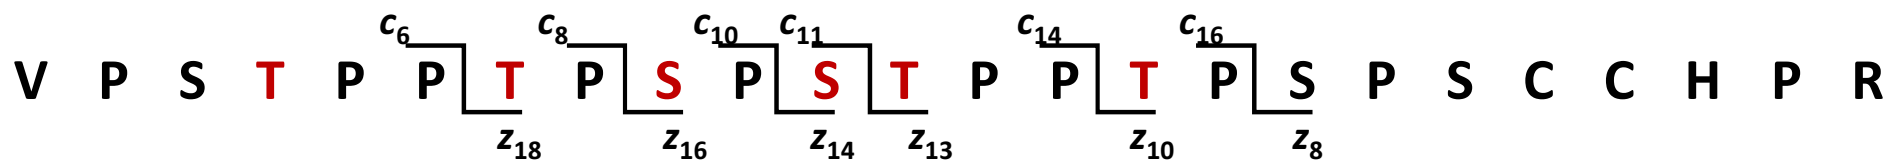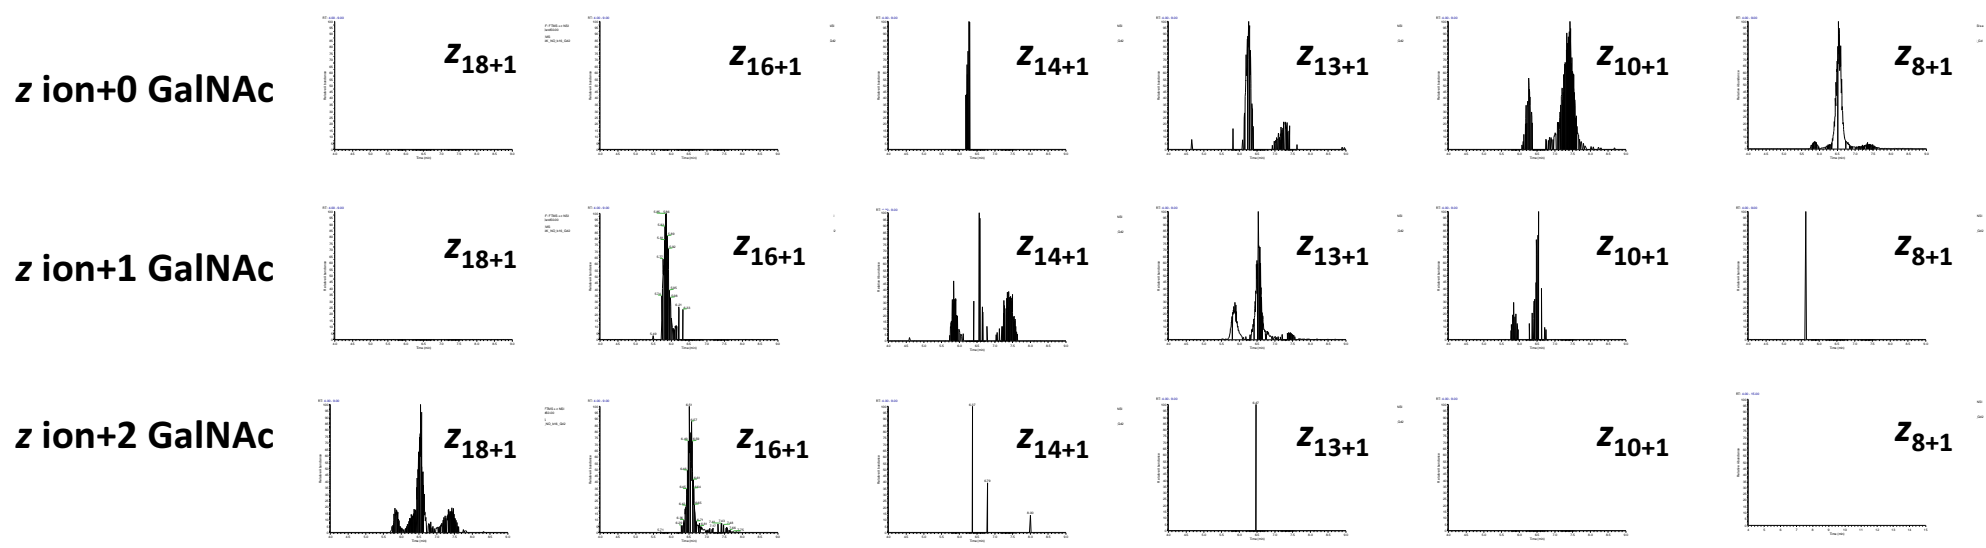

Supplementary Figure S2

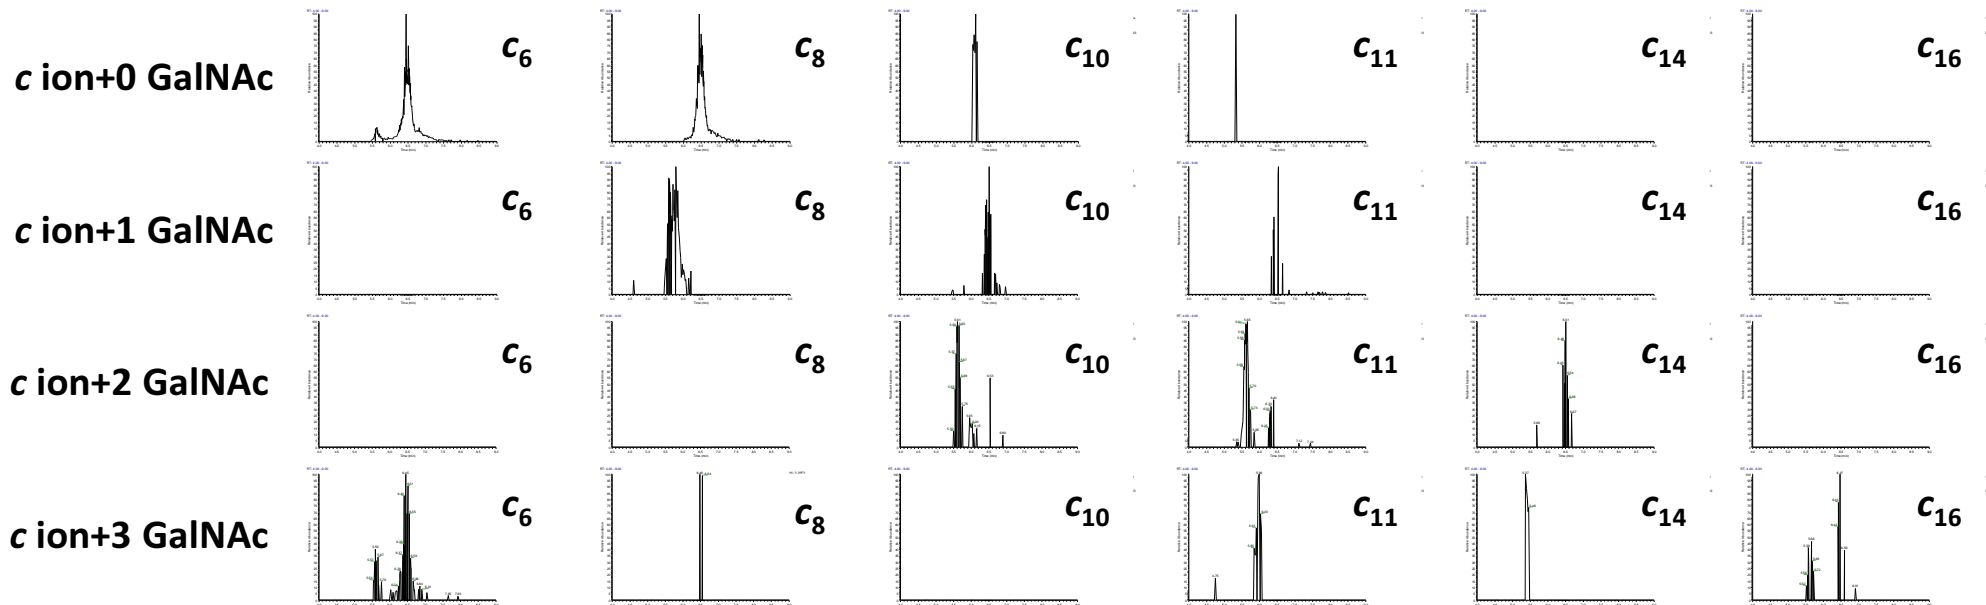

V P S **T** P P **T** P **S** P **S** **T** P P **T** P **S** P S C C H P R

$Z_{18}$   $Z_{16}$   $Z_{14}$   $Z_{13}$   $Z_{10}$   $Z_8$

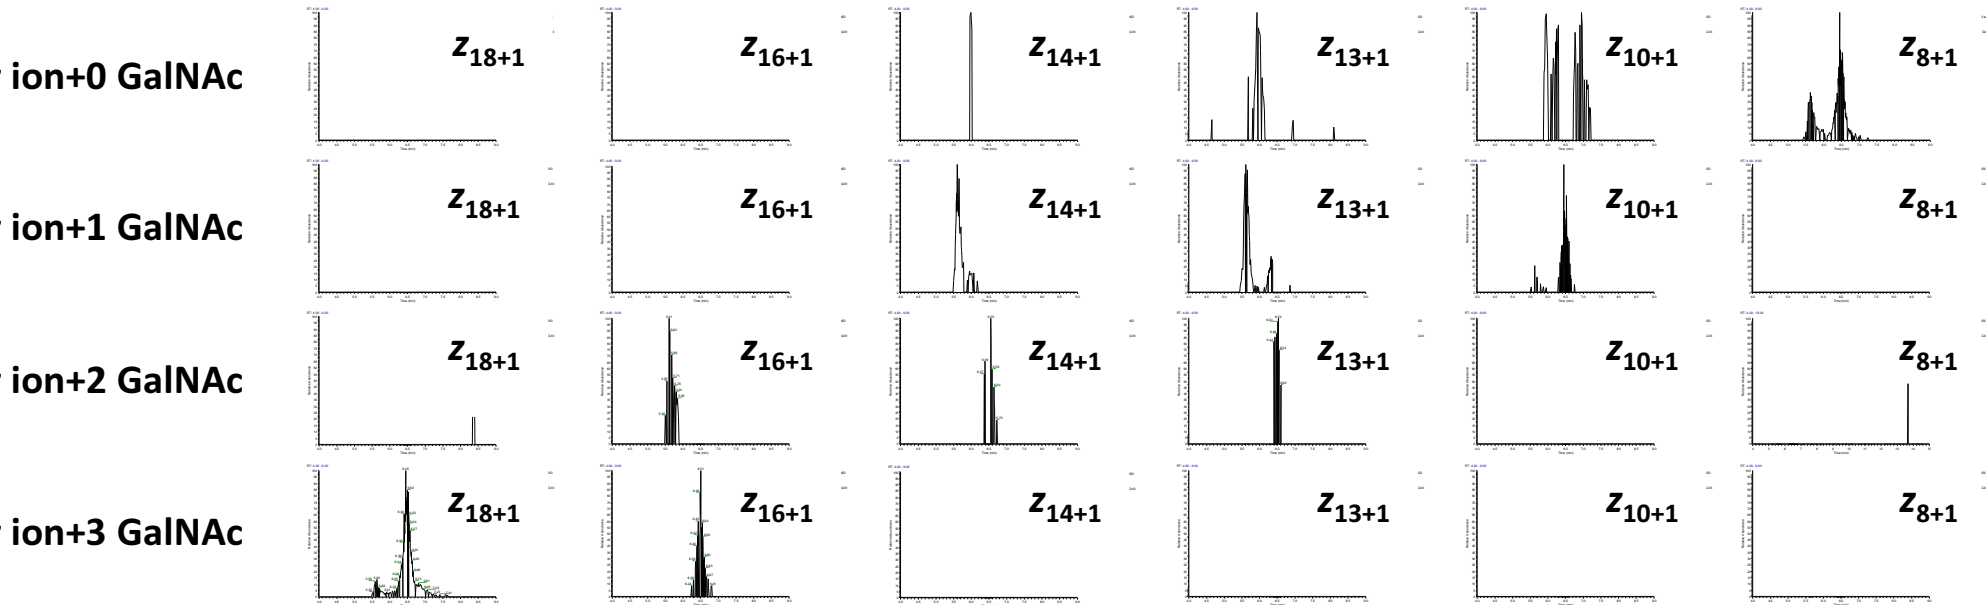

Supplementary Figure S3

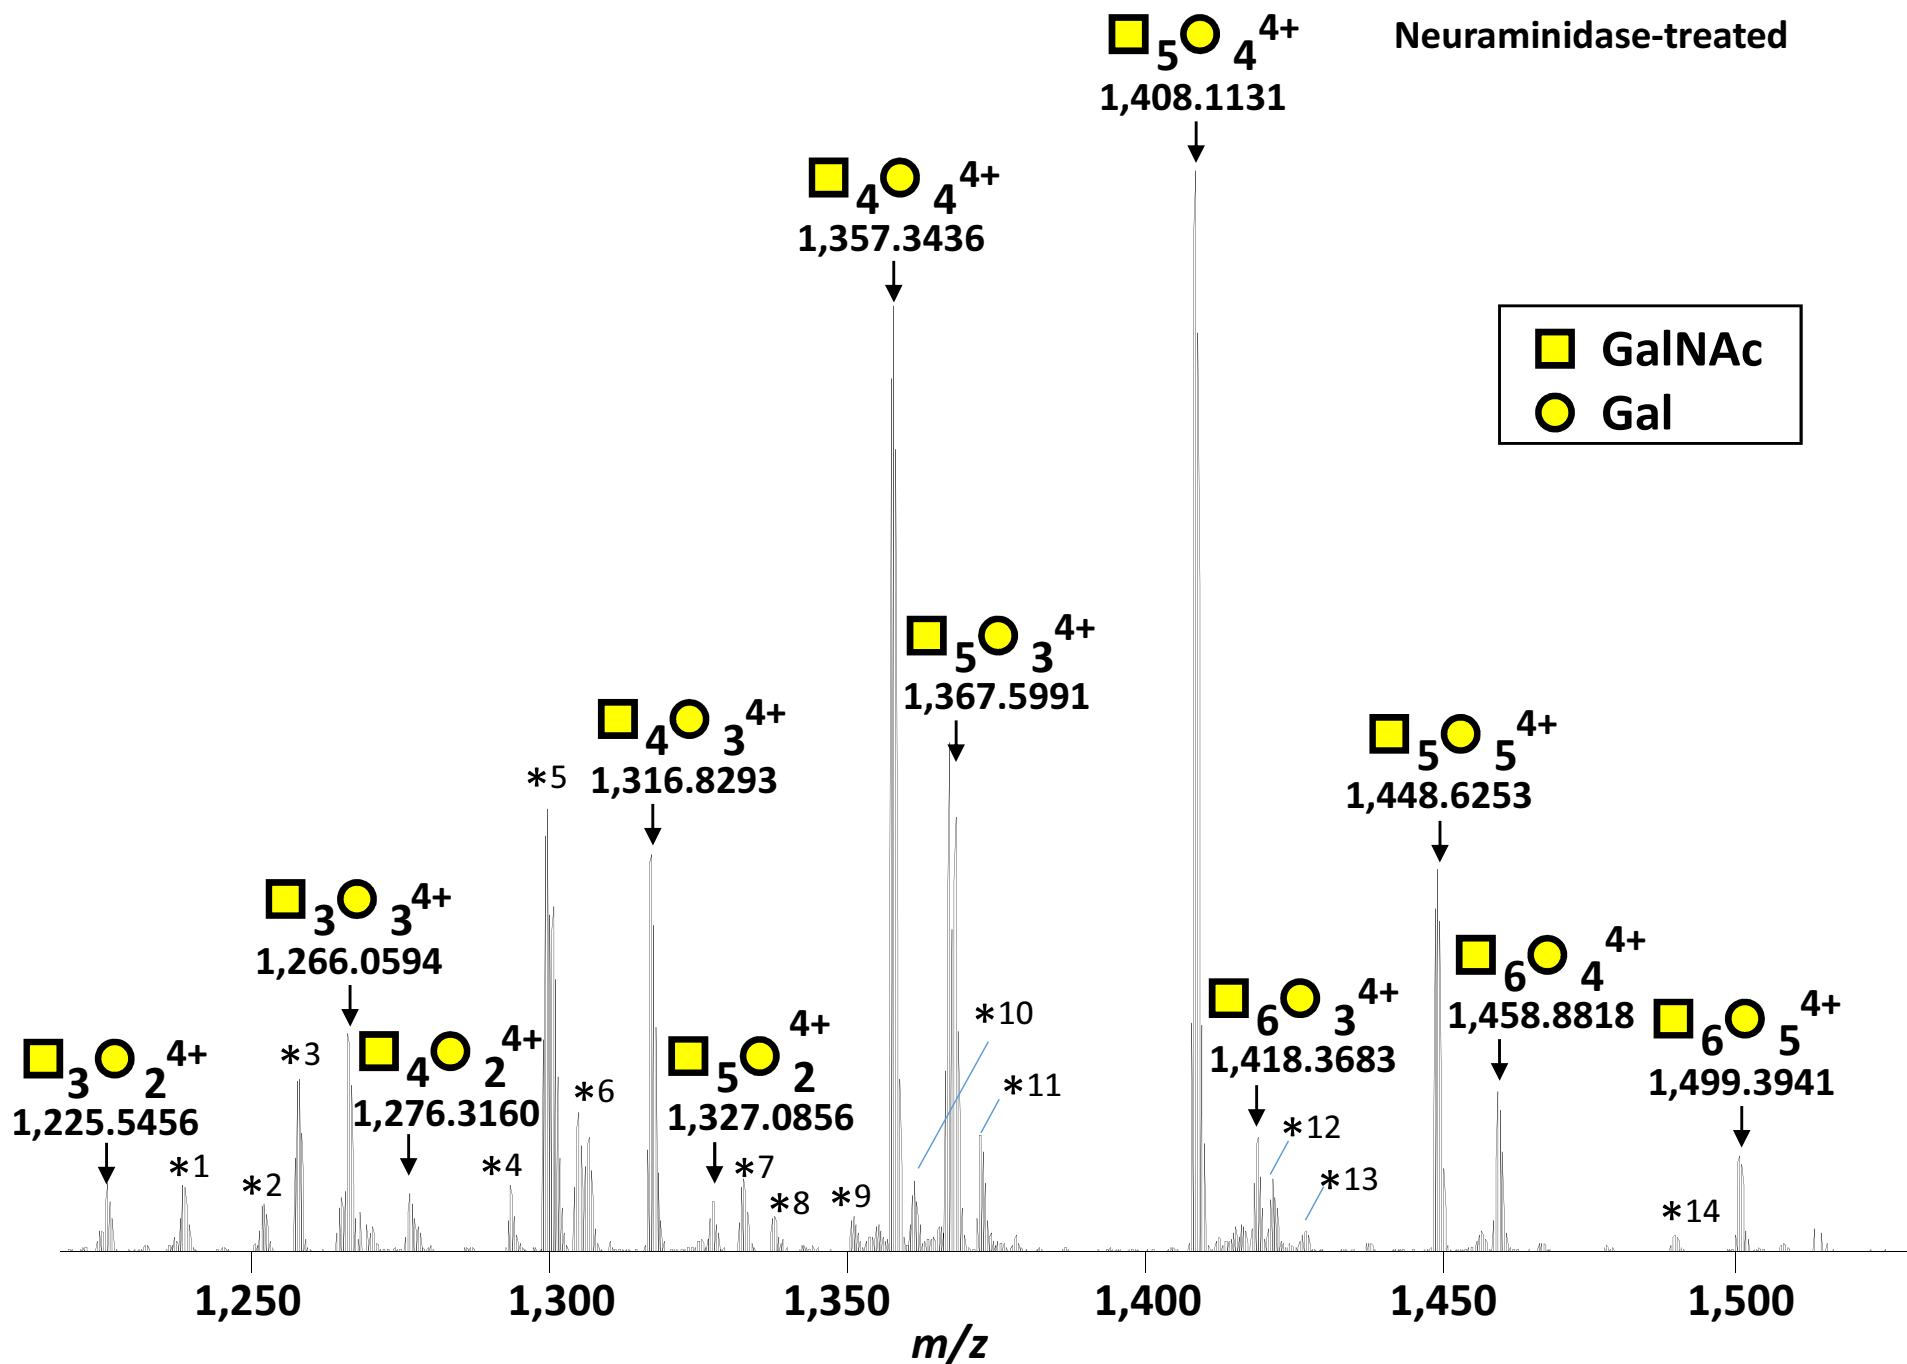

Supplementary Figure S4

**1 Gd O-glycoform**  
**(*m/z* 1042.9817)**

**2 Gd O-glycoform**  
**(*m/z* 1093.7515)**

**3 Gd O-glycoform**  
**(*m/z* 1144.5214)**

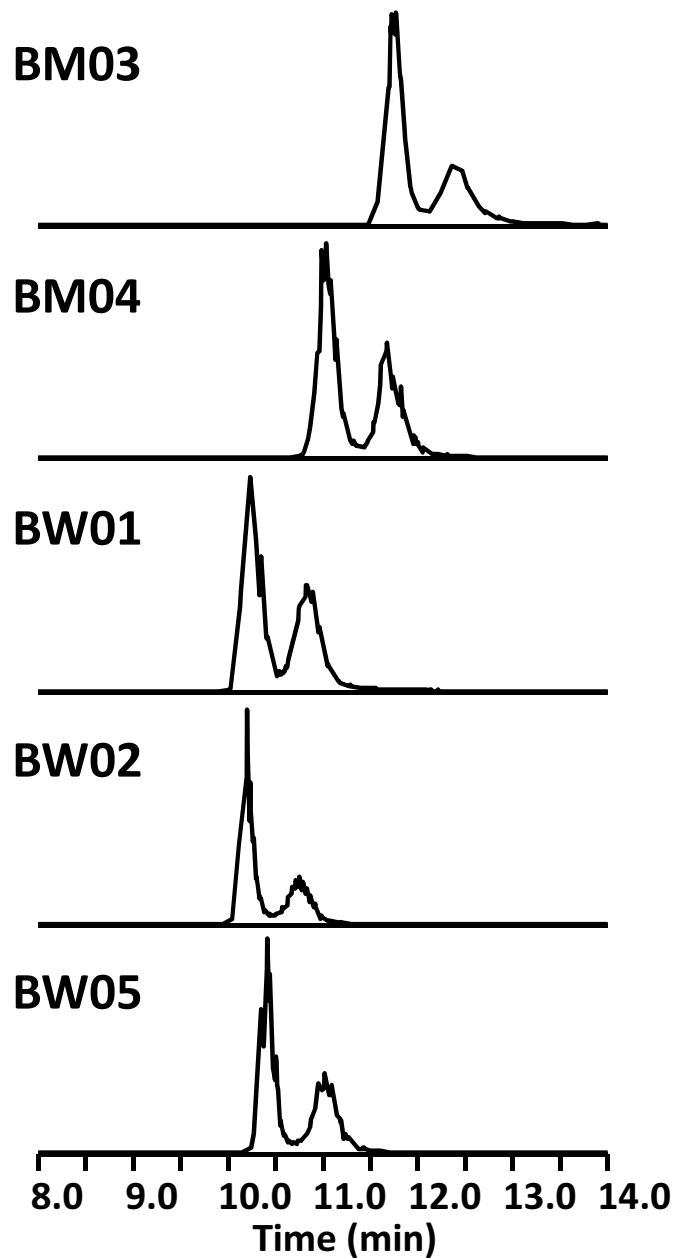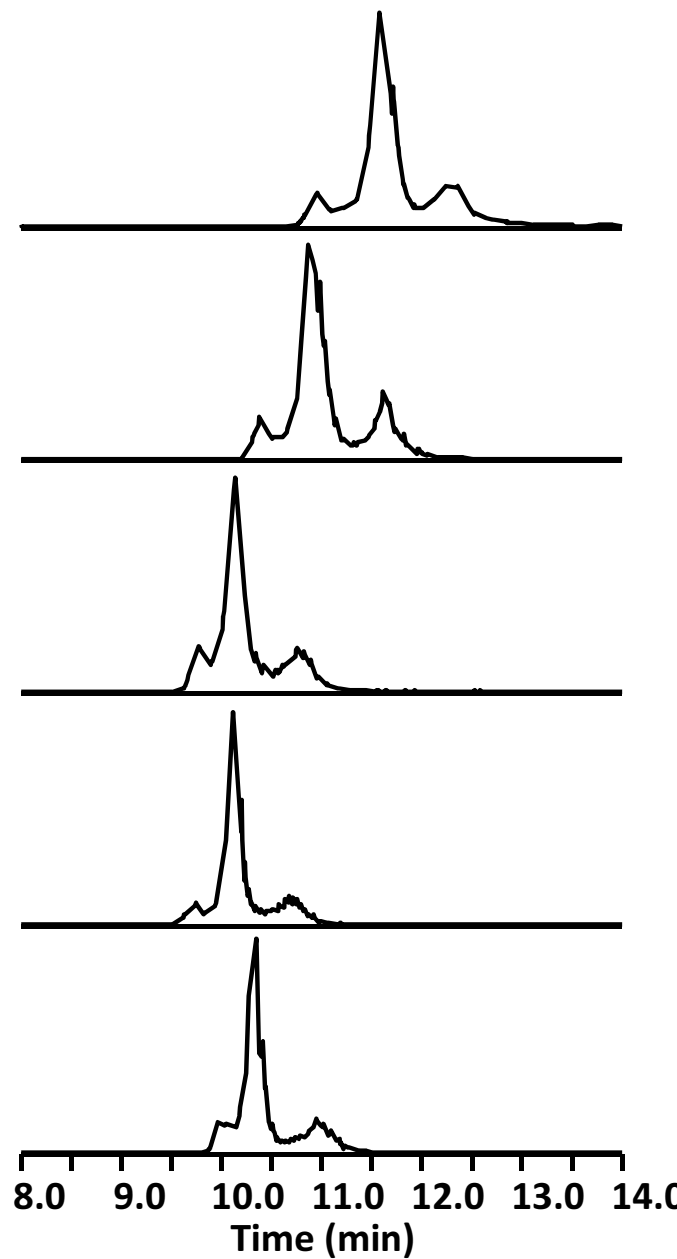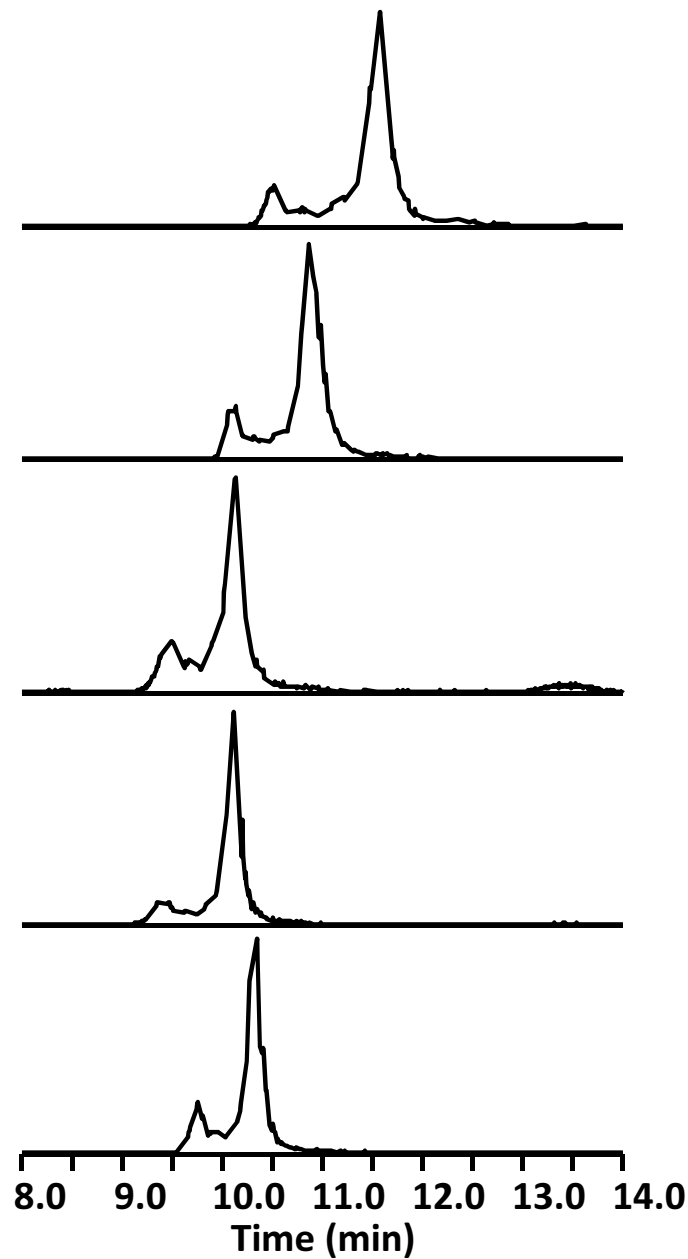

| Number of GalNAc_Gal/HR | <i>O</i> -glycanase from <i>S. pneumoniae</i> |        | <i>O</i> -glycanase from <i>E. faecalis</i> |        |
|-------------------------|-----------------------------------------------|--------|---------------------------------------------|--------|
|                         | Intensity                                     | RA (%) | Intensity                                   | RA (%) |
| 0_0                     | 1.4.E+09                                      | 13.68  | 2.8.E+09                                    | 45.95  |
| 1_0                     | 1.6.E+09                                      | 16.28  | 2.6.E+09                                    | 41.93  |
| 1_1                     | 2.0.E+09                                      | 20.56  | 7.0.E+06                                    | 0.11   |
| 2_0                     | 4.9.E+08                                      | 4.93   | 6.3.E+08                                    | 10.23  |
| 2_1                     | 1.3.E+09                                      | 13.32  | 2.6.E+06                                    | 0.04   |
| 2_2                     | 9.7.E+08                                      | 9.75   | 1.7.E+07                                    | 0.27   |
| 3_0                     | 1.1.E+08                                      | 1.10   | 8.7.E+07                                    | 1.40   |
| 3_1                     | 3.1.E+08                                      | 3.10   |                                             | N.D.   |
| 3_2                     | 7.4.E+08                                      | 7.48   |                                             | N.D.   |
| 3_3                     | 3.8.E+08                                      | 3.83   |                                             | N.D.   |
| 4_0                     | 6.6.E+06                                      | 0.07   | 3.7.E+06                                    | 0.06   |
| 4_1                     | 5.3.E+07                                      | 0.53   |                                             | N.D.   |
| 4_2                     | 1.4.E+08                                      | 1.45   |                                             | N.D.   |
| 4_3                     | 2.4.E+08                                      | 2.45   |                                             | N.D.   |
| 4_4                     | 5.7.E+07                                      | 0.57   |                                             | N.D.   |
| 5_2                     | 1.8.E+07                                      | 0.18   |                                             | N.D.   |
| 5_3                     | 3.4.E+07                                      | 0.34   |                                             | N.D.   |
| 5_4                     | 2.8.E+07                                      | 0.28   |                                             | N.D.   |
| 5_5                     | 9.7.E+06                                      | 0.10   |                                             | N.D.   |
| Total                   | 9.9.E+09                                      | 100    | 6.2.E+09                                    | 100    |

**Supplementary Table S1.** Comparison of RA of each *O*-glycopeptide after sequential deglycosylation using *O*-glycanase from *S. pneumoniae* and *O*-glycanase from *E. faecalis*.

| Number of<br>GalNAc_Gal/HR | RA, determined by the<br>Analyzer (%)<br><i>n</i> =1 | RA, determined<br>manually (%)<br><i>n</i> =1 |
|----------------------------|------------------------------------------------------|-----------------------------------------------|
| 0_0                        | 36.34                                                | 33.18                                         |
| 1_0                        | 43.63                                                | 43.9                                          |
| 2_0                        | 15.43                                                | 17.23                                         |
| 3_0                        | 4.29                                                 | 5.27                                          |
| 4_0                        | 0.23                                                 | 0.3                                           |
| 5_0                        | 0.03                                                 | 0.04                                          |
| 6_0                        | n.d.                                                 | n.d.                                          |

**Supplementary Table S2.** Relative abundance (RA,%) of each *O*-glycopeptide after sequential deglycosylation, determined by an automated program (Glycan Analyzer) and manually. n.d., not detected.

| Product ion          | Number of GalNAc | Theoretical mass ( $m/z$ ) | Detected ion ( $m/z$ ) | Mass error (ppm) | RT (min)             |
|----------------------|------------------|----------------------------|------------------------|------------------|----------------------|
| (c 6) <sup>-1</sup>  | 0                | 596.3402                   | 596.3391               | -1.84            | 5.49-13.87           |
| (c 6) <sup>-1</sup>  | 1                | 799.4196                   | -                      | -                | -                    |
| (c 8) <sup>-1</sup>  | 0                | 794.4407                   | 794.4392               | -1.89            | 5.47-13.76           |
| (c 8) <sup>-1</sup>  | 1                | 997.5201                   | 997.5195               | -0.60            | 5.63-5.77            |
| (c 10) <sup>-1</sup> | 0                | 978.5255                   | 978.5245               | -1.02            | 5.49-10.99           |
| (c 10) <sup>-1</sup> | 1                | 1181.6049                  | -                      | -                | -                    |
| (c 11) <sup>-1</sup> | 0                | 1065.5575                  | 1065.5541              | -3.19            | 5.49-13.36           |
| (c 11) <sup>-1</sup> | 1                | 1268.6369                  | 1268.6330, 1268.6302   | -3.07, -5.28     | 5.63-5.80, 6.19-8.01 |
| (c 14) <sup>-1</sup> | 0                | 1360.7107                  | 1360.7067              | -2.94            | 5.74-6.17            |
| (c 14) <sup>-1</sup> | 1                | 1563.7901                  | 1563.7744, 1563.7816   | 10.04, -5.45     | 6.52, 6.89           |
| (c 16) <sup>-1</sup> | 0                | 1558.8111                  | -                      | -                | -                    |
| (c 16) <sup>-1</sup> | 1                | 1761.8905                  | 1761.8907              | 0.11             | 5.53-8.63            |

| Product ion            | Number of GalNAc | Theoretical mass ( $m/z$ ) | Detected ion ( $m/z$ ) | Mass error (ppm) | RT (min)             |
|------------------------|------------------|----------------------------|------------------------|------------------|----------------------|
| (z 18+1) <sup>-1</sup> | 1                | 2036.9052                  | 2036.907               | 0.88             | 5.47-11.74           |
| (z 18+1) <sup>-1</sup> | 0                | 1833.8258                  | -                      | -                | -                    |
| (z 16+1) <sup>-1</sup> | 1                | 1838.8048                  | 1838.8084              | 1.96             | 5.55-10.60           |
| (z 16+1) <sup>-1</sup> | 0                | 1635.7254                  | 1635.7296              | 2.57             | 5.66-5.76            |
| (z 14+1) <sup>-1</sup> | 1                | 1654.7200                  | 1654.7206              | 0.06             | 5.55-9.06            |
| (z 14+1) <sup>-1</sup> | 0                | 1451.6406                  | 1451.6523              | 8.06             | 6.58-7.34            |
| (z 13+1) <sup>-1</sup> | 1                | 1567.6880                  | 1567.6856              | -1.53            | 5.53-10.73           |
| (z 13+1) <sup>-1</sup> | 0                | 1364.6086                  | 1364.6082, 1364.6030   | -0.29, -4.10     | 5.63-5.82, 6.18-8.61 |
| (z 10+1) <sup>-1</sup> | 1                | 1272.5348                  | 1272.5473              | 9.82             | 5.58-6.21            |
| (z 10+1) <sup>-1</sup> | 0                | 1069.4554                  | 1069.4669, 1069.4613   | 10.75, 5.52      | 5.68, 6.18-9.82      |
| (z 8+1) <sup>-1</sup>  | 1                | 1074.4343                  | -                      | -                | -                    |
| (z 8+1) <sup>-1</sup>  | 0                | 871.3549                   | 871.3589               | 4.59             | 5.51-10.73           |

**Supplementary Table S3.** The theoretical product ion mass ( $m/z$ ) derived from the precursor ion corresponding to 1 Gd *O*-glycoform ( $m/z$  877.7456). The mass value ( $m/z$ ) of the detected fragment ion, mass error (ppm), and retention time (RT, min) are shown.



| Product ion          | Number of GalNAc | Theoretical mass (m/z) | Detected ion (m/z)              | Mass error (ppm)    | RT (min)                        |
|----------------------|------------------|------------------------|---------------------------------|---------------------|---------------------------------|
| (c 6) <sup>+1</sup>  | 0                | 596.3402               | 596.3387                        | -2.52               | 5.66-9.97                       |
| (c 6) <sup>+1</sup>  | 1                | 799.4196               | -                               | -                   | -                               |
| (c 6) <sup>+1</sup>  | 2                | 1002.4990              | -                               | -                   | -                               |
| (c 8) <sup>+1</sup>  | 0                | 794.4407               | 794.4398                        | -1.13               | 5.98-10.08                      |
| (c 8) <sup>+1</sup>  | 1                | 997.5201               | 997.5172                        | -2.91               | 5.49-6.37                       |
| (c 8) <sup>+1</sup>  | 2                | 1200.5995              | -                               | -                   | -                               |
| (c 10) <sup>+1</sup> | 0                | 978.5255               | 978.5219                        | -3.68               | 6.30-6.95                       |
| (c 10) <sup>+1</sup> | 1                | 1181.6049              | 1181.6024, 1181.5981, 1181.6005 | -2.12, -5.75, -3.72 | 5.74-6.01, 6.48-6.73, 7.30-8.43 |
| (c 10) <sup>+1</sup> | 2                | 1384.6843              | 1384.6831                       | -0.87               | 6.14-6.32                       |
| (c 11) <sup>+1</sup> | 0                | 1065.5575              | 1065.5548                       | -2.53               | 6.32-6.98                       |
| (c 11) <sup>+1</sup> | 1                | 1268.6369              | -                               | -                   | -                               |
| (c 11) <sup>+1</sup> | 2                | 1471.7163              | 1471.7144, 1471.7213            | -1.29, 3.40         | 6.06-6.37, 7.03-7.25            |
| (c 14) <sup>+1</sup> | 0                | 1360.7107              | -                               | -                   | -                               |
| (c 14) <sup>+1</sup> | 1                | 1563.7901              | 1563.7965, 1563.7777            | 4.09, -7.93         | 5.79-5.98, 6.34-6.60            |
| (c 14) <sup>+1</sup> | 2                | 1766.8695              | 1766.8520, 1766.8655            | -9.90, -2.26        | 6.22-6.30, 7.06-7.72            |
| (c 16) <sup>+1</sup> | 0                | 1558.8111              | -                               | -                   | -                               |
| (c 16) <sup>+1</sup> | 1                | 1761.8905              | -                               | -                   | -                               |
| (c 16) <sup>+1</sup> | 2                | 1964.9699              | 1964.9663                       | -1.83               | 5.73-8.51                       |

| Product ion            | Number of GalNAc | Theoretical mass (m/z) | Detected ion (m/z)              | Mass error (ppm)    | RT (min)                        |
|------------------------|------------------|------------------------|---------------------------------|---------------------|---------------------------------|
| (z 18+1) <sup>+1</sup> | 2                | 2239.9846              | 2239.9942                       | 4.29                | 5.73-10.31                      |
| (z 18+1) <sup>+1</sup> | 1                | 2036.9052              | -                               | -                   | -                               |
| (z 18+1) <sup>+1</sup> | 0                | 1833.8258              | -                               | -                   | -                               |
| (z 16+1) <sup>+1</sup> | 2                | 2041.8842              | 2041.8770                       | -3.53               | 6.29-7.94                       |
| (z 16+1) <sup>+1</sup> | 1                | 1838.8048              | 1838.8095                       | 2.56                | 5.49-6.33                       |
| (z 16+1) <sup>+1</sup> | 0                | 1635.7254              | -                               | -                   | -                               |
| (z 14+1) <sup>+1</sup> | 2                | 1857.7994              | 1857.8079, 1857.7899            | 4.58, -6.19         | 6.37, 6.77                      |
| (z 14+1) <sup>+1</sup> | 1                | 1654.72                | 1654.7173, 1654.7177, 1654.7342 | -1.63, -1.39, 8.58  | 5.73-6.11, 6.40-6.78, 7.04-7.63 |
| (z 14+1) <sup>+1</sup> | 0                | 1451.6406              | 1451.6375                       | -2.14               | 6.19-6.29                       |
| (z 13+1) <sup>+1</sup> | 2                | 1770.7674              | 1770.7855                       | 10.22               | 6.47                            |
| (z 13+1) <sup>+1</sup> | 1                | 1567.688               | 1567.6837, 1567.6824, 1567.6917 | -2.74, -3.57, 2.36  | 5.51-6.19, 6.30-7.21, 7.36-8.71 |
| (z 13+1) <sup>+1</sup> | 0                | 1364.6086              | 1364.6060, 1364.6083, 1364.6084 | -1.91, -0.22, -0.15 | 6.09-6.39, 6.93-7.62, 8.9-8.96  |
| (z 10+1) <sup>+1</sup> | 2                | 1475.6142              | -                               | -                   | -                               |
| (z 10+1) <sup>+1</sup> | 1                | 1272.5348              | 1272.5360, 1272.5298            | 0.94, -3.93         | 5.77-5.96, 6.28-6.75            |
| (z 10+1) <sup>+1</sup> | 0                | 1069.4554              | 1069.4532, 1069.4470            | -2.06, -7.85        | 6.12-6.37, 6.80-8.45            |
| (z 8+1) <sup>+1</sup>  | 2                | 1277.5137              | -                               | -                   | -                               |
| (z 8+1) <sup>+1</sup>  | 1                | 1074.4343              | -                               | -                   | -                               |
| (z 8+1) <sup>+1</sup>  | 0                | 871.3549               | 871.3535                        | -1.61               | 5.68-9.58                       |

**Supplementary Table S4.** The theoretical product ion mass (m/z) derived from the precursor ion corresponding to 2 Gd O-glycoform (m/z 945.4388). The mass value (m/z) of the detected fragment ion, mass error (ppm), and retention time (RT, min) are shown.

| Product ion          | Number of GalNAc | Theoretical mass ( $m/z$ ) | Detected ion ( $m/z$ ) | Mass error (ppm) | RT (min)             |
|----------------------|------------------|----------------------------|------------------------|------------------|----------------------|
| (c 6) <sup>+1</sup>  | 0                | 596.3402                   | 596.3385               | -2.85            | 5.48-8.47            |
| (c 6) <sup>+1</sup>  | 1                | 799.4196                   | -                      | -                | -                    |
| (c 6) <sup>+1</sup>  | 2                | 1002.4990                  | -                      | -                | -                    |
| (c 6) <sup>+1</sup>  | 3                | 1205.5784                  | -                      | -                | -                    |
| (c 8) <sup>+1</sup>  | 0                | 794.4407                   | 794.4400               | -0.88            | 6.03-8.27            |
| (c 8) <sup>+1</sup>  | 1                | 997.5201                   | 997.517                | -3.11            | 5.48-6.21            |
| (c 8) <sup>+1</sup>  | 2                | 1200.5995                  | -                      | -                | -                    |
| (c 8) <sup>+1</sup>  | 3                | 1403.6789                  | -                      | -                | -                    |
| (c 10) <sup>+1</sup> | 0                | 978.5255                   | 978.5267               | 1.23             | 6.03-6.15            |
| (c 10) <sup>+1</sup> | 1                | 1181.6049                  | 1181.6008              | -3.47            | 6.31-6.97            |
| (c 10) <sup>+1</sup> | 2                | 1384.6843                  | 1384.6707              | -9.82            | 5.50-6.15            |
| (c 10) <sup>+1</sup> | 3                | 1587.7637                  | -                      | -                | -                    |
| (c 11) <sup>+1</sup> | 0                | 1065.5575                  | -                      | -                | -                    |
| (c 11) <sup>+1</sup> | 1                | 1268.6369                  | 1268.6288              | -6.38            | 6.34-6.83            |
| (c 11) <sup>+1</sup> | 2                | 1471.7163                  | 1471.7061, 1471.7185   | -6.93, 1.49      | 5.35-5.85, 6.25-6.40 |
| (c 11) <sup>+1</sup> | 3                | 1674.7957                  | 1674.7922              | -2.09            | 5.85-6.05            |
| (c 14) <sup>+1</sup> | 0                | 1360.7107                  | -                      | -                | -                    |
| (c 14) <sup>+1</sup> | 1                | 1563.7901                  | -                      | -                | -                    |
| (c 14) <sup>+1</sup> | 2                | 1766.8695                  | 1766.8716, 1766.8491   | 1.19, -0.45      | 5.69, 6.43-6.67      |
| (c 14) <sup>+1</sup> | 3                | 1969.9489                  | 1969.9453              | -1.83            | 5.37-5.46            |
| (c 16) <sup>+1</sup> | 0                | 1558.8111                  | -                      | -                | -                    |
| (c 16) <sup>+1</sup> | 1                | 1761.8905                  | -                      | -                | -                    |
| (c 16) <sup>+1</sup> | 2                | 1964.9699                  | -                      | -                | -                    |
| (c 16) <sup>+1</sup> | 3                | 2168.0493                  | 2168.0454, 2168.0434   | -1.80, -2.72     | 5.52-5.72, 6.42-6.81 |

| Product ion            | Number of GalNAc | Theoretical mass ( $m/z$ ) | Detected ion ( $m/z$ ) | Mass error (ppm) | RT (min)             |
|------------------------|------------------|----------------------------|------------------------|------------------|----------------------|
| (z 18+1) <sup>+1</sup> | 3                | 2443.0640                  | 2443.0729              | 3.64             | 5.50-7.63            |
| (z 18+1) <sup>+1</sup> | 2                | 2239.9846                  | -                      | -                | -                    |
| (z 18+1) <sup>+1</sup> | 1                | 2036.9052                  | -                      | -                | -                    |
| (z 18+1) <sup>+1</sup> | 0                | 1833.8258                  | -                      | -                | -                    |
| (z 16+1) <sup>+1</sup> | 3                | 2244.9636                  | 2244.9598              | -1.69            | 6.24-6.81            |
| (z 16+1) <sup>+1</sup> | 2                | 2041.8842                  | 2041.8824              | -0.88            | 5.50-5.87            |
| (z 16+1) <sup>+1</sup> | 1                | 1838.8048                  | -                      | -                | -                    |
| (z 16+1) <sup>+1</sup> | 0                | 1635.7254                  | -                      | -                | -                    |
| (z 14+1) <sup>+1</sup> | 3                | 2060.8788                  | -                      | -                | -                    |
| (z 14+1) <sup>+1</sup> | 2                | 1857.7994                  | 1857.8037              | 2.31             | 6.37-6.73            |
| (z 14+1) <sup>+1</sup> | 1                | 1654.7200                  | 1654.7186              | -0.85            | 5.50-6.17            |
| (z 14+1) <sup>+1</sup> | 0                | 1451.6406                  | 1451.6491              | 5.86             | 5.97-6.01            |
| (z 13+1) <sup>+1</sup> | 3                | 1973.8468                  | -                      | -                | -                    |
| (z 13+1) <sup>+1</sup> | 2                | 1770.7674                  | 1770.7806              | 7.45             | 6.41-6.60            |
| (z 13+1) <sup>+1</sup> | 1                | 1567.6880                  | 1567.6830, 1567.6843   | -3.19, -2.36     | 5.46-5.97, 6.13-6.37 |
| (z 13+1) <sup>+1</sup> | 0                | 1364.6086                  | 1364.6054              | -2.34            | 5.81-6.13            |
| (z 10+1) <sup>+1</sup> | 3                | 1678.6936                  | -                      | -                | -                    |
| (z 10+1) <sup>+1</sup> | 2                | 1475.6142                  | -                      | -                | -                    |
| (z 10+1) <sup>+1</sup> | 1                | 1272.5348                  | 1272.5365, 1272.5433   | 1.34, 6.68       | 5.52-5.95, 6.29-6.75 |
| (z 10+1) <sup>+1</sup> | 0                | 1069.4554                  | 1069.4556, 1069.4503   | 0.19, -4.77      | 5.89-6.29, 6.71-7.20 |
| (z 8+1) <sup>+1</sup>  | 3                | 1480.5931                  | -                      | -                | -                    |
| (z 8+1) <sup>+1</sup>  | 2                | 1277.5137                  | -                      | -                | -                    |
| (z 8+1) <sup>+1</sup>  | 1                | 1074.4343                  | -                      | -                | -                    |
| (z 8+1) <sup>+1</sup>  | 0                | 871.3549                   | 871.3534               | -1.72            | 5.44-7.24            |

**Supplementary Table S5.** The theoretical product ion mass ( $m/z$ ) derived from the precursor ion corresponding to 3 Gd *O*-glycoform ( $m/z$  1,013.13198). The mass value ( $m/z$ ) of the detected fragment ion, mass error (ppm), and retention time (RT, min) are shown.

# **Analysis of *O*-glycoforms of the IgA1 hinge region by sequential deglycosylation**

## *Supplementary Information*

**Yukako Ohyama<sup>1</sup>, Hisateru Yamaguchi<sup>2</sup>, Kazuki Nakajima<sup>3</sup>, Tomohiro Mizuno<sup>4</sup>, Yukihiro Fukamachi<sup>5</sup>, Yasuto Yokoi<sup>5</sup>, Naotake Tsuboi<sup>1</sup>, Daijo Inaguma<sup>1</sup>, Midori Hasegawa<sup>1</sup>, Matthew B. Renfrow<sup>6</sup>, Jan Novak<sup>6</sup>, Yukio Yuzawa<sup>1</sup>, Kazuo Takahashi<sup>1,6,7\*</sup>**

<sup>1</sup>Department of Nephrology, Fujita Health University School of Medicine, Toyoake, Japan

<sup>2</sup>Institute for Comprehensive Medical Science, Fujita Health University, Toyoake, Japan

<sup>3</sup>Center for Research Promotion and Support, Fujita Health University, Toyoake, Japan

<sup>4</sup>Analytical Pharmacology, Faculty of Pharmacy, Meijo University, Nagoya, Japan

<sup>5</sup>Mitsui Knowledge Industry, Tokyo, Japan

<sup>6</sup>Departments of Biochemistry and Molecular Genetics and Microbiology, University of Alabama at Birmingham, Birmingham, AL, USA

<sup>7</sup>Department of Biomedical Molecular Sciences, Fujita Health University School of Medicine, Toyoake, Japan

## Supplementary Table and Figure Legends

### Supplementary Figures

**Supplementary Figure S1.** Extracted ion chromatograms (XIC) of each product ion of the one-galactose-deficient (Gd) *O*-glycoform.

The XIC of product ions are shown within the tolerance of  $\pm 10$  ppm. The attachment sites were identified based on a combination of *c* and *z* fragments. The *c* ions ( $c_6$ – $c_{14}$ ) without *N*-acetylgalactosamine (GalNAc) and  $c_{16}$  with one GalNAc residue were detected in the first section of XIC [retention time (RT), 5.5–6.2 min]. Further, *z* ions ( $z_{10}$ – $z_{18}$ ) with one GalNAc residue and  $z_8$  without GalNAc were identified, as a mirror image of the *c* ions. This indicated that GalNAc was attached at T<sup>236</sup>. In addition, the *c* ions ( $c_8$ ,  $c_{11}$ , and  $c_{16}$ ) with one GalNAc residue and *z* ions ( $z_8$ – $z_{13}$  and  $z_{16}$ ) without GalNAc were identified in a subsection of the first section (RT, 5.6–5.8 min). This indicated that in the 1 Gd *O*-glycoform detected in that section, Gd *O*-Glycan was attached mainly at T<sup>236</sup> and partially at T<sup>228</sup>. The *c* ions ( $c_6$ – $c_8$ ) without GalNAc and *c* ions ( $c_{11}$ – $c_{16}$ ) with one GalNAc residue were identified in the second section (RT, 6.2–13.9 min). The *c* ions ( $c_{10}$  and  $c_{11}$ ) without GalNAc and *z* ions ( $z_{13}$  and  $z_{14}$ ) with one GalNAc residue were detected (with low intensity) in this section. This indicated that in the latter section, the 1 Gd *O*-glycoform harbored a Gd *O*-Glycan mainly at S<sup>230</sup>, and partially at T<sup>233</sup> or S<sup>232</sup> (Fig. 6a).

**Supplementary Figure S2.** The XIC of each product ion of the 2 Gd *O*-glycoform.

The XIC of product ions are shown within the tolerance of  $\pm 10$  ppm. To identify the attachment sites of the 2 Gd *O*-glycoform, the presence or absence of the *c* ions with up to two GalNAc residues and *z* ions with up to two GalNAc residues were determined based on the theoretical product ion mass (Supplementary Table S3). To demonstrate the detection time of product ions, the XIC of each product ion was generated (Supplementary Fig. S2). Detection of  $c_6$  without GalNAc, *c* ions ( $c_8$ ,  $c_{10}$ , and  $c_{14}$ ) with one GalNAc residue, and  $c_{16}$  with two GalNAc residues indicated that in the 2 Gd *O*-glycoform in the first section of XIC (RT, 5.5–6.1 min), the Gd *O*-glycans were attached at T<sup>228</sup> and T<sup>236</sup>. For the second section (RT, 6.1–6.3 min), detection of  $c_6$  without GalNAc,  $c_8$  with one GalNAc residue, and *c* ions ( $c_{10}$ – $c_{16}$ ) with two GalNAc residues indicated that Gd *O*-glycans were located at T<sup>228</sup> and S<sup>230</sup>. In the third section (RT, 6.3–6.8 min), *c* ions ( $c_6$ – $c_{11}$ ) without GalNAc,  $c_{14}$  with one GalNAc residue, and  $c_{16}$  with two GalNAc residues were identified. The *z* ions ( $z_{13}$ – $z_{18}$ ) with two GalNAc residues,  $z_{10}$  with one GalNAc residue, and  $z_8$  without GalNAc were identified. In the same section,  $c_{10}$  with one GalNAc residue and *z* ions ( $z_{13}$  and  $z_{14}$ ) with one GalNAc residue were also identified. This indicated that in peptides in this section, the Gd *O*-glycan attachment sites were at S<sup>230</sup> or T<sup>233</sup>, and T<sup>236</sup>. In the fourth section (RT, 6.8–10.3 min), *c* ions ( $c_6$ – $c_8$ ) without GalNAc,  $c_{10}$  with one GalNAc residue, and *c* ions ( $c_{11}$ – $c_{16}$ ) with two GalNAc residues were detected. The *z* ions

( $z_{16-18}$ ) with two GalNAc residues,  $z_{14}$  with one GalNAc residue, and  $z$  ions ( $z_{8-10}$ ) without GalNAc were also identified. This indicated the presence of Gd *O*-glycan attachment sites at  $S^{230}$  and  $T^{233}$ . In the same section,  $z_{13}$  without GalNAc was also detected, albeit as a minor species. This indicated that the 2 Gd *O*-glycoform in the fourth section contained minor species with the glycan attached at  $S^{230}$  and  $S^{232}$  instead of  $T^{233}$  (Fig. 6b).

**Supplementary Figure S3.** The XIC of each product ion of the 3 Gd *O*-glycoform.

The XIC of product ions are shown within the tolerance of  $\pm 10$  ppm. To identify the attachment sites of the 3 Gd *O*-glycoform, the presence or absence of  $c$  ions with up to three GalNAc residues and  $z$  ions with up to three GalNAc residues were determined based on the theoretical product ion mass (Supplementary Table S3). To demonstrate the detection time of product ions, the XIC of each product ion was generated (Supplementary Fig. S3). In the first section of XIC (RT, 5.4–5.8 min),  $c_6$  without GalNAc,  $c_8$  with one GalNAc residue,  $c$  ions ( $c_{10-14}$ ) with two GalNAc residues, and  $c_{16}$  with three GalNAcs residues were identified. Further,  $z_{18}$  with three GalNAc residues,  $z_{16}$  with two GalNAc residues,  $z$  ions ( $z_{10-14}$ ) with one GalNAc residue, and  $z_8$  without GalNAc were detected. This indicated that in the 3 Gd *O*-glycoform in the first section, the attachment sites were at  $T^{228}$ ,  $S^{230}$ , and  $T^{236}$ . In the second section (RT, 5.8–6.1 min),  $c_6$  without GalNAc,  $c_8$  with one GalNAc residue,  $c_{10}$  with two GalNAc residues, and  $c_{11}$  with three GalNAc residues were detected. Similar,  $z_{18}$  with three GalNAc residues,  $z_{14}$  with one GalNAc residue, and  $z$  ions ( $z_{8-13}$ ) without GalNAc were identified. This indicated that the Gd *O*-glycan was located at  $T^{228}$ ,  $S^{230}$ , and  $S^{232}$ . In the third section (RT, 6.1–6.7 min),  $c$  ions ( $c_6-c_8$ ) without GalNAc,  $c_{10}$  with one GalNAc residue,  $c_{11}$  with one or two GalNAc residues,  $c_{14}$  with two GalNAc residues, and  $c_{16}$  with three GalNAc residues were detected. Further,  $z$  ions ( $z_{16-18}$ ) with three GalNAc residues,  $z_{14}$  with two GalNAc residues,  $z_{13}$  with two or one GalNAc residue,  $z_{10}$  with one GalNAc residue, and  $z_8$  without GalNAc were detected. This indicated that the Gd *O*-glycan was attached at  $S^{230}$ ,  $T^{236}$ , and  $T^{233}$  or  $S^{232}$ . In the fourth section (RT, 6.7–8.5 min), detection of  $c$  ions ( $c_6-c_8$ ) without GalNAc and  $z$  ions ( $z_{8-10}$ ) without GalNAc indicated that  $S^{230}$ ,  $S^{232}$  and  $T^{233}$  were glycosylated (Fig. 6c).

**Supplementary Figure S4.** Representative mass spectrum of desialylated tryptic fragment of IgA1 HR *O*-glycoforms. The monoisotopic  $m/z$  value of HR *O*-glycopeptide ions, the number of sugar moieties assigned and their charge numbers are shown above the individual peaks. Twelve mass peaks of HR with *O*-glycans were detected, representing molecules with three to six *O*-glycan chains with up to three Gd *O*-glycans. \*Marks unassigned peaks that are triply charged ions were not (glyco)peptides derived from IgA1 HR. The information of monoisotopic  $m/z$  value of unassigned peaks are provided below.

\*<sup>1</sup> 1238.5827, \*<sup>2</sup>1251.8635, \*<sup>3</sup>1257.5893, \*<sup>4</sup>1293.2321, \*<sup>5</sup>1299.2357, \*<sup>6</sup>1304.5669, \*<sup>7</sup>1332.2640,

\*<sup>8</sup>1337.5954, \*<sup>9</sup>1350.9012, \*<sup>10</sup>1360.9246, \*<sup>11</sup>1372.2600, \*<sup>12</sup>1420.9452, \*<sup>13</sup>1426.6148, \*<sup>14</sup>1488.6379

**Supplementary Figure S5.** The extracted ion chromatogram (XIC) of 1-3 Gd *O*-glycans with tryptic digested HR (H<sup>208</sup>-R<sup>245</sup>) detected from five individual samples named (BM03, BM04, BW00, BW01, and BW02). The monoisotopic *m/z* values of 1-3 Gd *O*-glycoforms are 1042.9817, 1093.7515, and 1144.5214 respectively. We note the minor differences in eluting times that were dependent on the date of sample analysis, specifically on the conditions of LC column. Relative abundance of each isomeric glycoform of individual samples are shown in dataset 3.

#### **Supplementary Tables (Supplementary\_data.xls)**

**Supplementary Table S1.** Comparison of RA of each *O*-glycopeptide of IgA myeloma protein Mce1 after sequential deglycosylation using *O*-glycanase from *S. pneumoniae* and *O*-glycanase from *E. faecalis*.

**Supplementary Table S2.** Relative abundance (RA,%) of each *O*-glycopeptide after sequential deglycosylation, determined by an automated program (Glycan Analyzer) and manually. n.d., not detected.

**Supplementary Table S3.** The theoretical product ion mass (*m/z*) derived from the precursor ion corresponding to 1 Gd *O*-glycoform (*m/z* 877.7456). The mass value (*m/z*) of the detected fragment ion, mass error (ppm), and retention time (RT, min) are shown.

**Supplementary Table S4.** The theoretical product ion mass (*m/z*) derived from the precursor ion corresponding to 2 Gd *O*-glycoform (*m/z* 945.4388). The mass value (*m/z*) of the detected fragment ion, mass error (ppm), and retention time (RT, min) are shown.

**Supplementary Table S5.** The theoretical product ion mass (*m/z*) derived from the precursor ion corresponding to 3 Gd *O*-glycoform (*m/z* 1,013.13198). The mass value (*m/z*) of the detected fragment ion, mass error (ppm), and retention time (RT, min) are shown.
